# Supplementary material for: A novel drug–drug cocrystal of tegafur and myricetin: optimized properties of dissolution and tabletability
Source: Royal Society of Chemistry journal article supplement (doi:10.1039/d3ce00794d), 2023-01-01
Supplement: d3ce00794d1.pdf [file d3ce00794d1.pdf]

## Supplementary data for

### **A novel drug-drug cocrystal of tegafur and myricetin: optimized properties of dissolution and tabletability**

**Min Zhang<sup>†a</sup>, Dai-Lin Gu<sup>†a</sup>, Jian-Feng Zhen<sup>b</sup>, Tong-Bu Lu<sup>b</sup>, Xia-Lin Dai<sup>\*a</sup>, Jia-Mei Chen<sup>\*a</sup>**

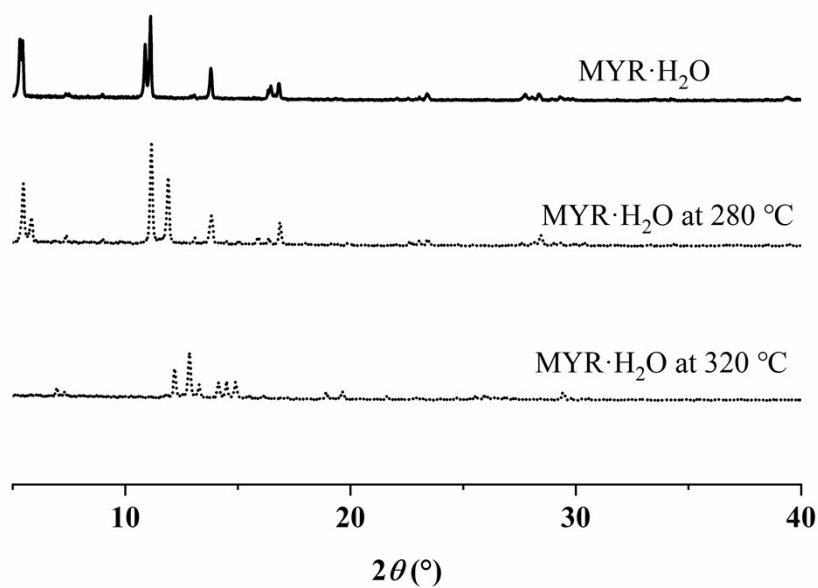

**Fig. S1** PXR D patterns for MYR·H<sub>2</sub>O after heating to 280 or 320 °C and cooling to room temperature in the DSC test.

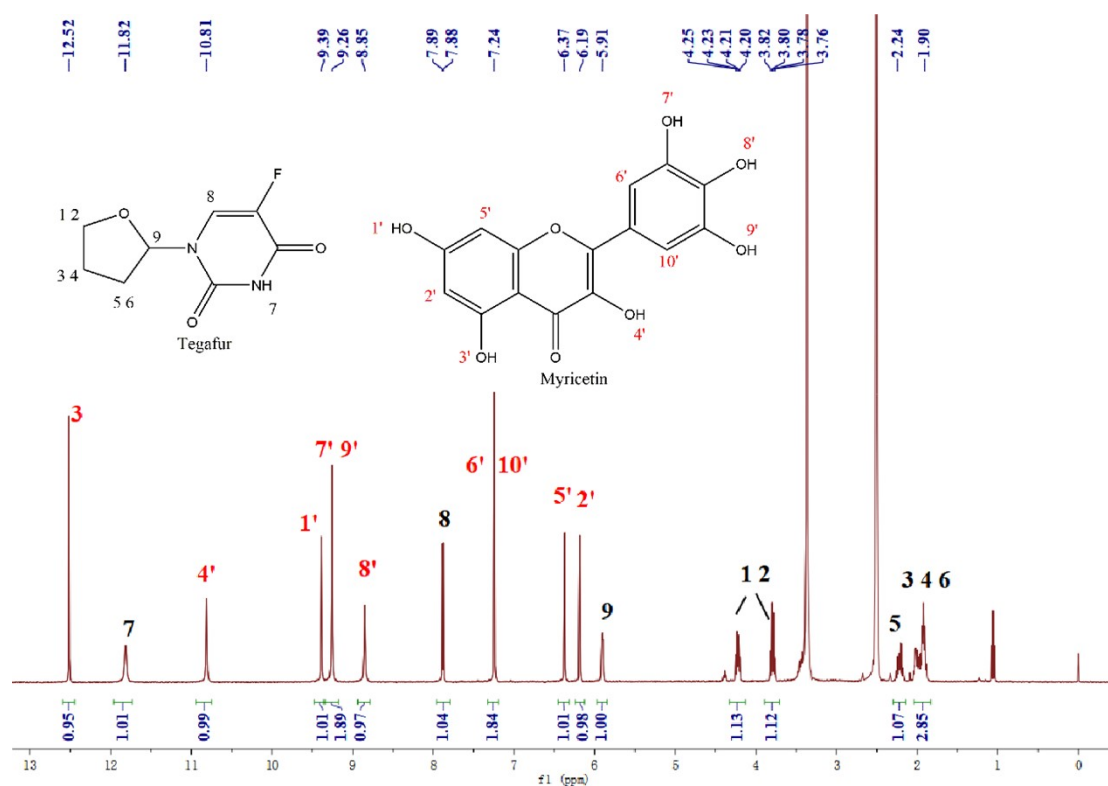

**Fig. S2** <sup>1</sup>H-NMR spectra of TGF-MYR with integrals.

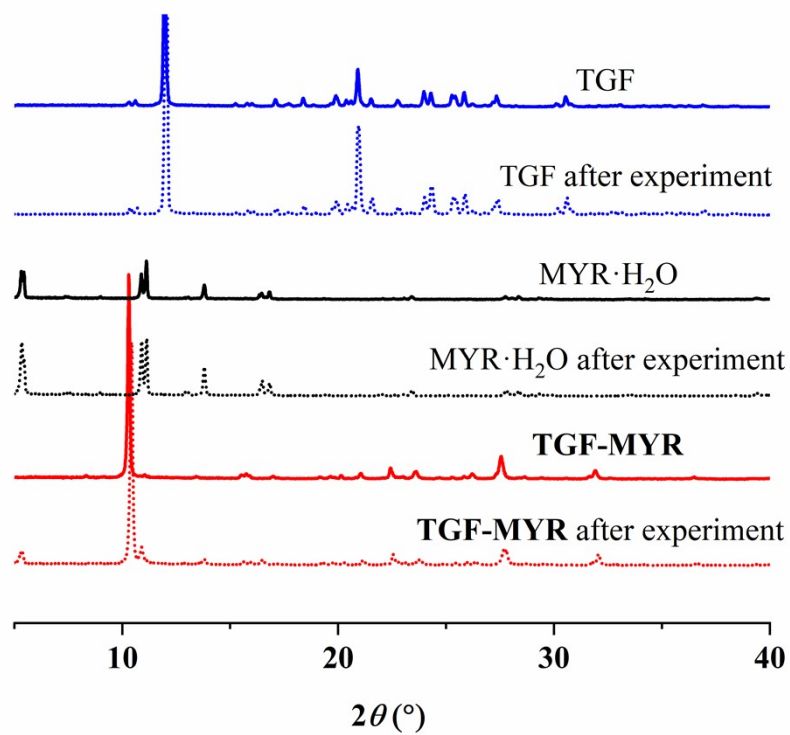

**Fig. S3** PXRD patterns of TGF, MYR·H<sub>2</sub>O and TGF-MYR after dissolution test at pH 6.8.

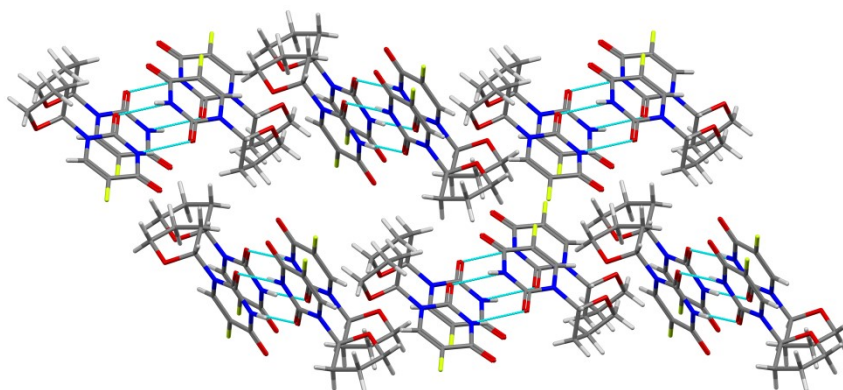

**Fig. S4** The 2D waved structure of TGF.

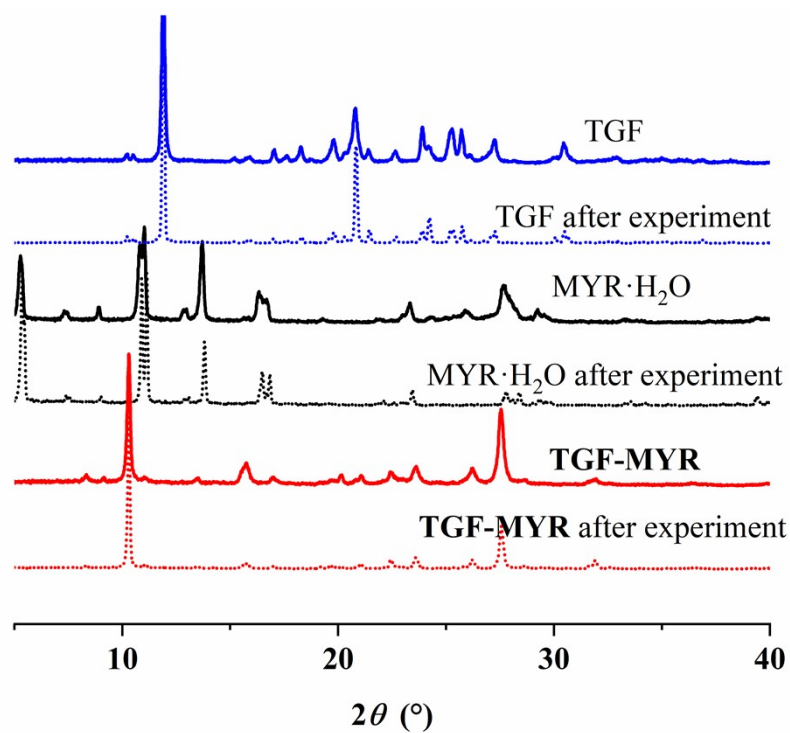

**Fig. S5** PXRD patterns of TGF, MYR·H<sub>2</sub>O and TGF-MYR after compaction experiments at 300 MPa.

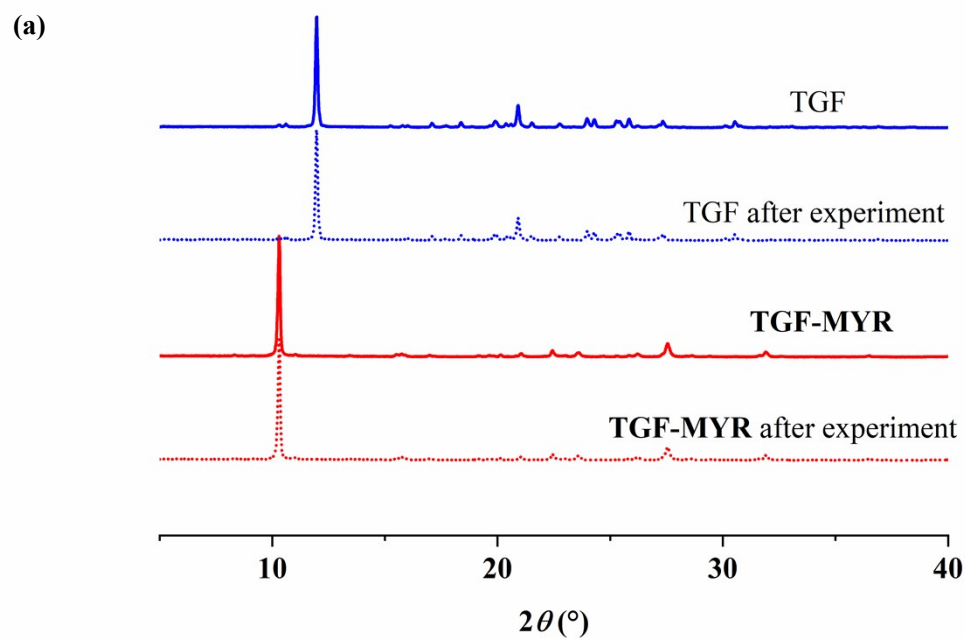

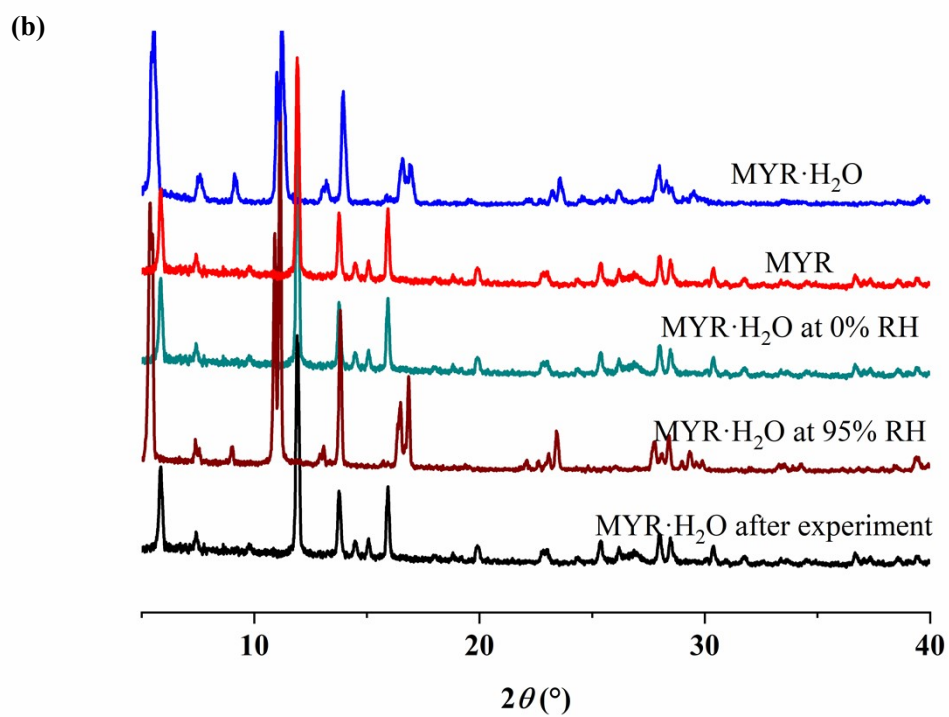

**Fig. S6** PXRD patterns for (a) TGF and TGF-MYR, and (b) MYR·H<sub>2</sub>O involved in DVS tests.

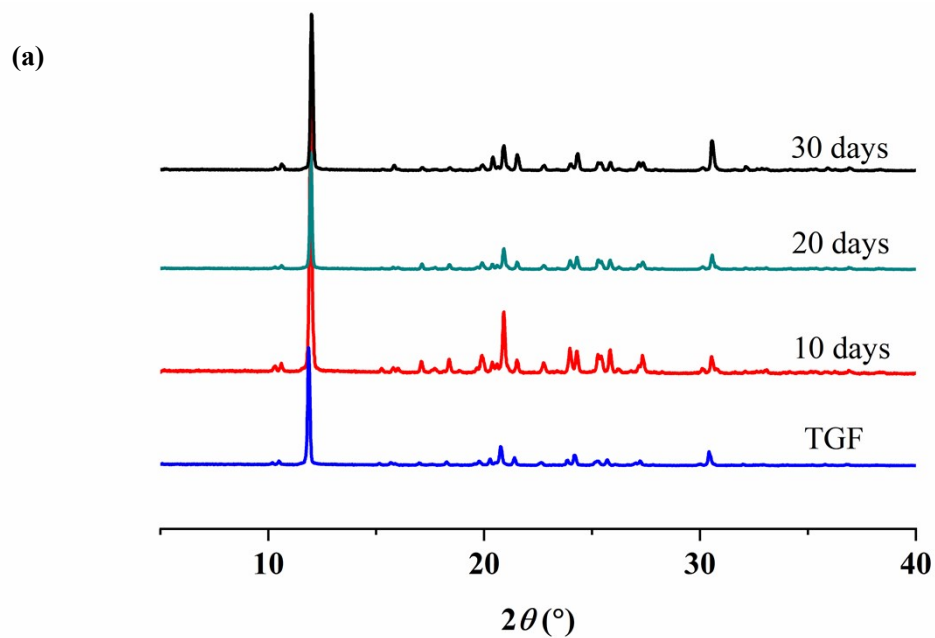

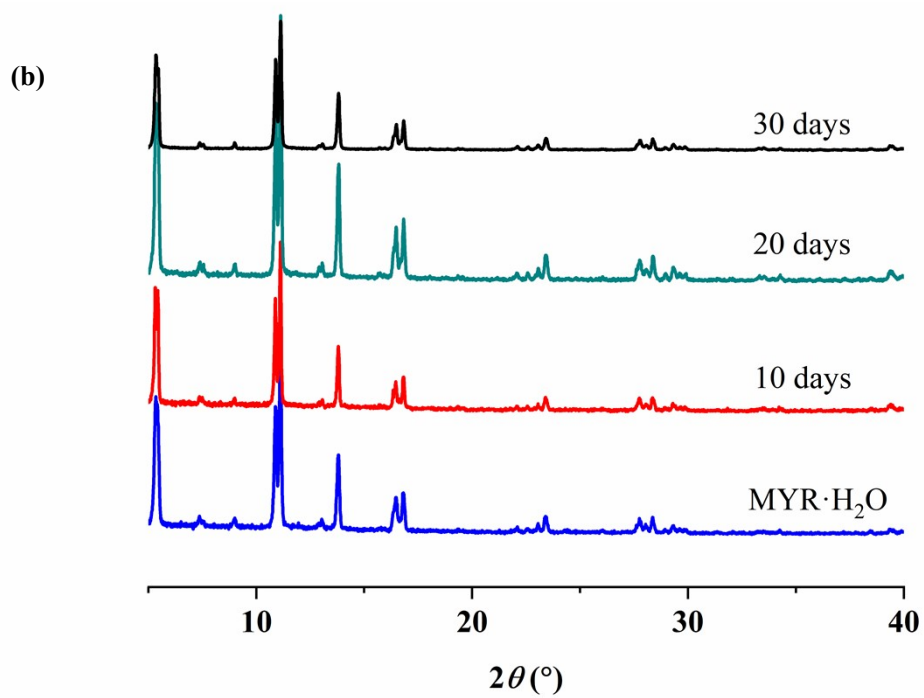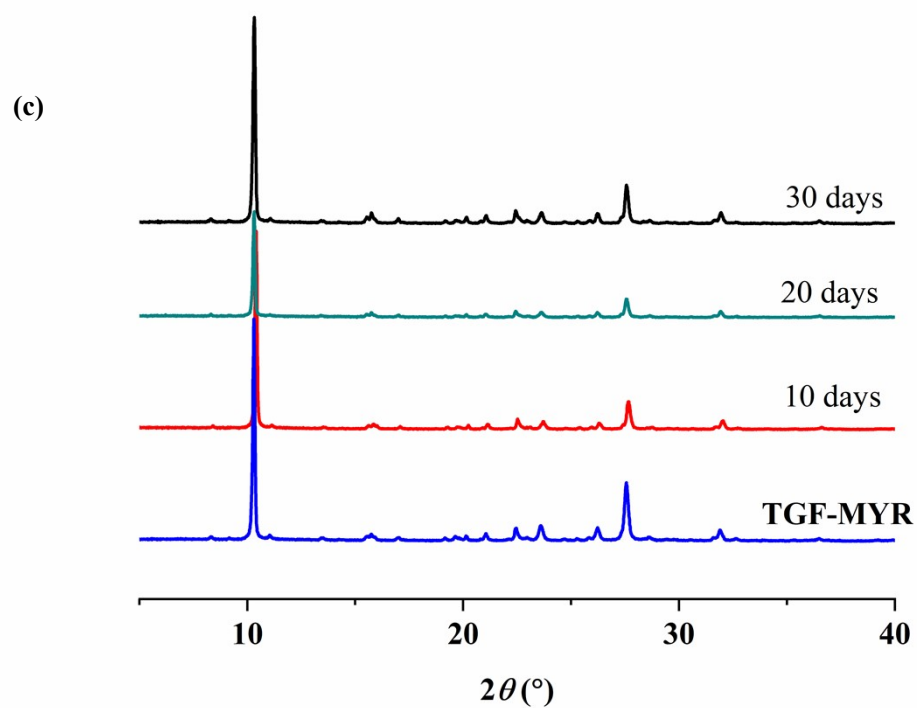

**Fig. S7** PXRd patterns of (a) TGF, (b) MYR·H<sub>2</sub>O and (c) TGF-MYR during storage under 40 °C /75% RH.
